# Supplementary material for: cRGD-modified and disulfide bond-crosslinked polymer nanoparticles based on iopamidol as a tumor-targeted CT contrast agent
Source: Royal Society of Chemistry journal article supplement (doi:10.1039/c9py01418g), 2019-12-03
Supplement: c9py01418g1.pdf [file c9py01418g1.pdf]

**SUPPORTING INFORMATION for**

**cRGD-modified and disulfide bond-crosslinked polymer nanoparticles based on  
iopamidol as a tumor-targeted CT contrast agent**

Chunhui Gao,<sup>‡a</sup> Yinghua Zhang,<sup>‡a</sup> Yan Zhang,<sup>a</sup> Shaoyong Li,<sup>a</sup> Xinlin Yang,<sup>b</sup> Yan  
Chen,<sup>a</sup> Jingwei Fu,<sup>a</sup> Yinsong Wang,<sup>\*a</sup> and Xiaoying Yang<sup>\*a</sup>

*<sup>a</sup> Tianjin Key Laboratory on Technologies Enabling Development of Clinical Therapeutics and  
Diagnostics (Theranostics), School of Pharmacy, Tianjin Medical University, Tianjin 300070,  
China*

*<sup>b</sup> Key Laboratory of Functional Polymer Materials, Ministry of Education, Institute of Polymer  
Chemistry; Collaborative Innovation Center of Chemical Science and Engineering (Tianjin)  
Nankai University, Tianjin 300071, China*

<sup>‡</sup> Chunhui Gao and Yinghua Zhang contributed equally to this work.

<sup>\*</sup> Corresponding authors. No. 22 Qixiangtai Road, Heping District, Tianjin 300070,  
China

Tel: +86 (22) 8333-6658; Fax: +86 (22) 8333-6690

E-mail: wangyinsong@tmu.edu.cn (Y. Wang); yangxiaoying@tmu.edu.cn (X. Yang)

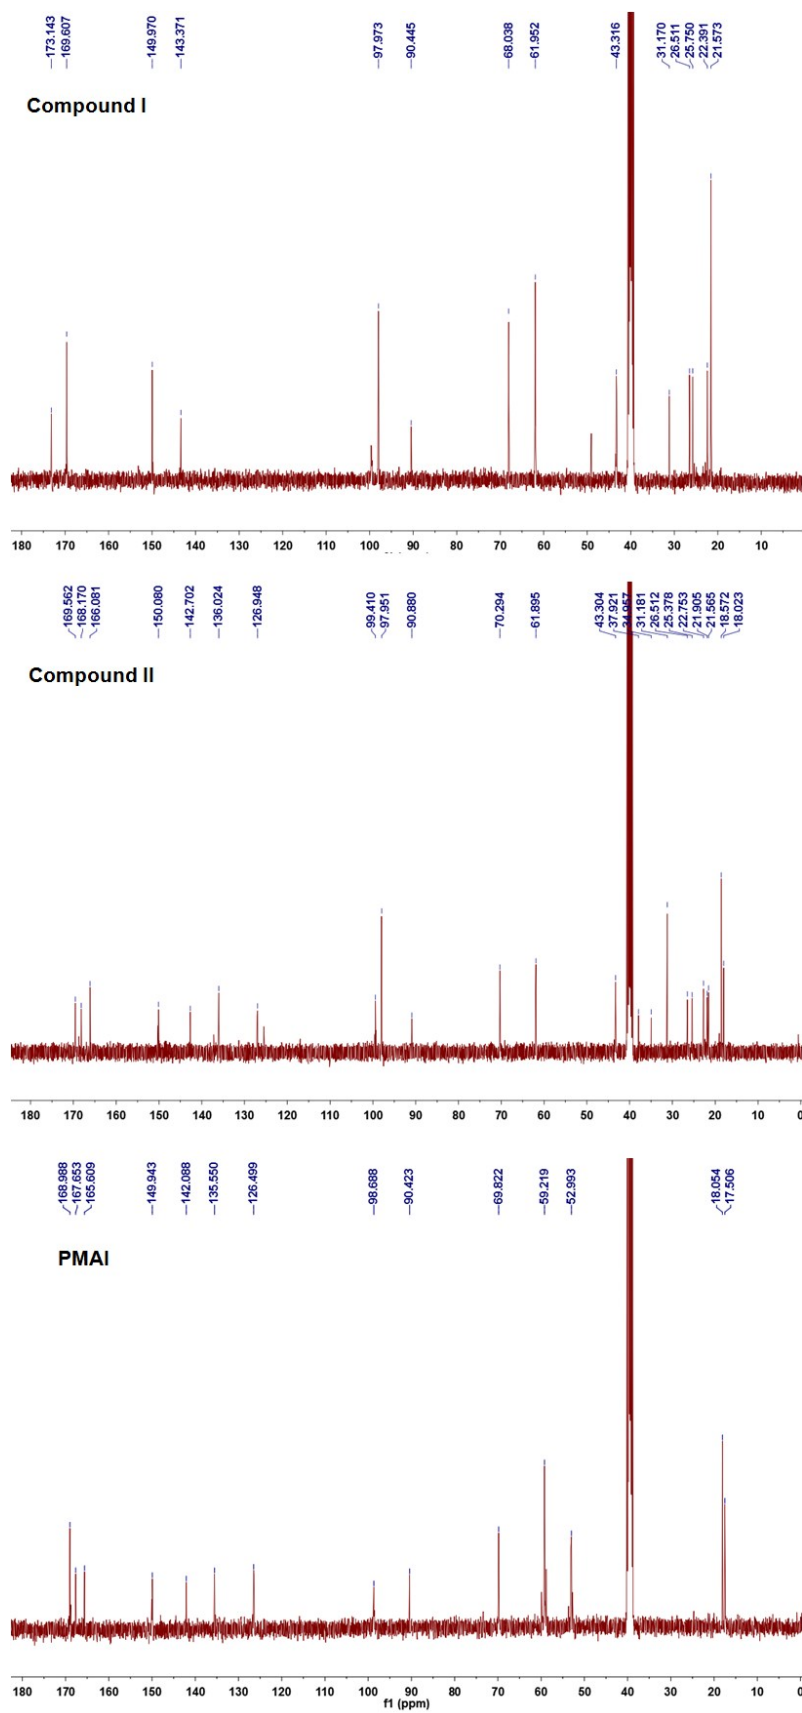

Figure S1  $^{13}\text{C}$  NMR spectra of compound I, compound II and MAI in  $\text{DMSO-d}_6$ .
